# Supplementary material
Source: PubMed Central journal article supplement (PMC3607052)
Supplement: 1222902110_pnas.201222902SI.pdf [file 1222902110_pnas.201222902SI.pdf]

# Supporting Information

Matsunari et al. 10.1073/pnas.1222902110

## SI Materials and Methods

**Fluorescence in Situ Hybridization.** Fetal fibroblast cells derived from a pancreatogenesis-disabled transgenic pig were cultured in MEM $\alpha$  containing 15% FBS (vol/vol) for 3 d. The cells were then cultured with 30  $\mu$ g/mL BrdU for 4 h, followed by incubation with 0.02  $\mu$ g/mL colcemide for 2 h. After fixation with methanol-acetic acid (3:1 ratio), the cells were spread on slides

and air-dried. The cells were then stained with Hoechst 33258 and treated with UV light for G-banding. *Pdx1* (pancreatic and duodenal homeobox 1)-*Hes1* (hairy enhancer split 1). DNA was labeled with digoxigenin-11-dUTP as a probe and hybridized at 37 °C overnight. After stringent washing, the bound label was detected with anti-Dig-Cy3 using Leica DRAM2 and CW4000 FISH software.

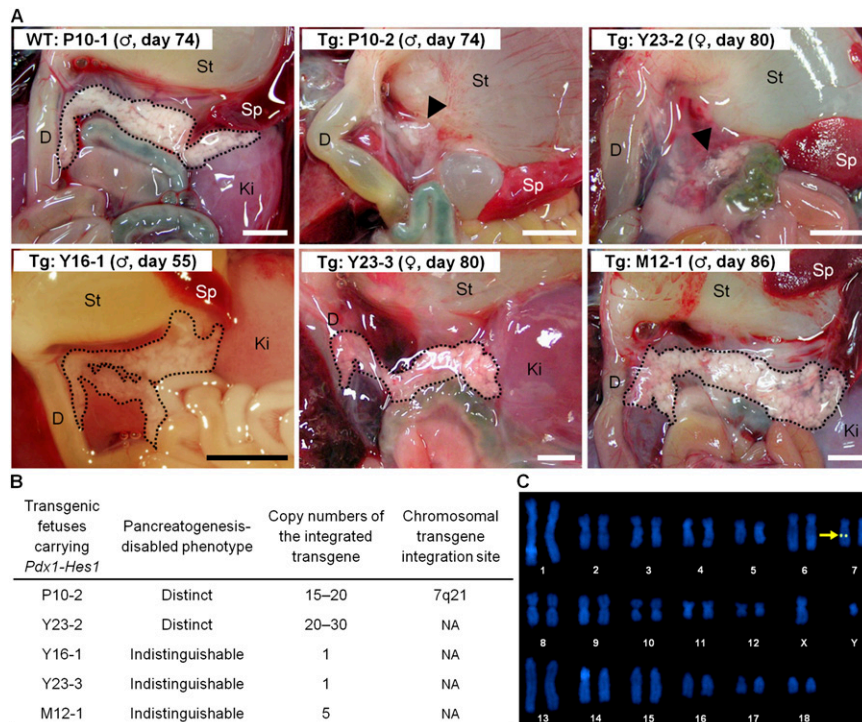

**Fig. S1.** Production details of pancreatogenesis-disabled *Pdx1-Hes1* transgenic pig fetuses. (A) Among the five transgenic fetuses obtained, a distinct pancreatogenesis-disabled phenotype was observed in one male (P10-2) and one female (Y23-2). These fetuses each had a vestigial pancreas (arrowhead) apparently less than 5% of normal size compared with that of a WT sibling fetus (P10-1). The pancreata of three other transgenic (Tg) fetuses (Y16-1, Y23-3, and M12-1) appeared indistinguishable from normal pancreata (P10-1). D, duodenum; Ki, kidney; Sp, spleen; St, stomach. (B) Phenotypic characteristics of the *Pdx1-Hes1* transgenic pig fetuses and integration patterns of the transgene. NA, not analyzed. (C) Karyogram for the pancreatogenesis-disabled *Pdx1-Hes1* transgenic fetus (P10-2) with fluorescent in situ hybridization, indicating single-site transgene integration (arrow). (Scale bars: A, 5 mm.)

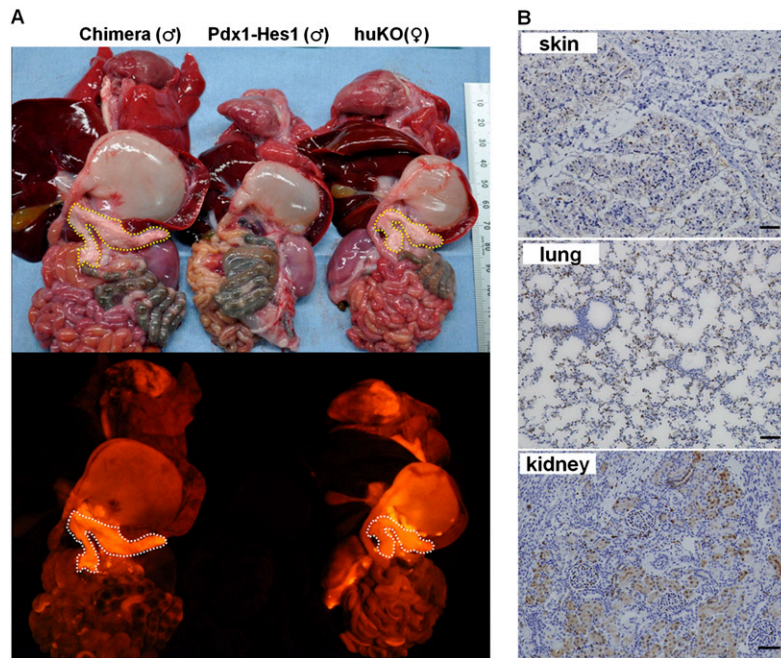

**Fig. S2.** Regeneration of the missing pancreata from exogenic cells in chimeric pig fetuses by complementation of *Pdx1-Hes1* clone embryos with the cloned embryos carrying the gene encoding orange fluorescent protein humanized Kusabira-Orange (*huKO*). (A) Orange fluorescence was observed systemically in chimeric fetuses, as seen in nonchimeric cloned fetuses derived from *huKO* cells. Orange fluorescence in the pancreata of the chimeric fetuses was prominent, indicating that these pancreata consisted primarily of donor cells expressing *huKO*. In contrast, a nonchimeric pancreatogenesis-disabled fetus derived from a *Pdx1-Hes1* embryo displayed no fluorescence. (B) Chimerism was confirmed histologically in all 10 of the organs/tissues observed, including skin, lung, and kidney, by immunostaining for *huKO*. (Scale bars: B, 50  $\mu$ m.)

| A | Chimeric boar | No. fetuses obtained | Fetuses displaying the pancreatogenesis-disabled phenotype* (%) | Fetuses carrying the <i>huKO</i> transgene† |
|---|---------------|----------------------|-----------------------------------------------------------------|---------------------------------------------|
|   | W126          | 12                   | 5 (41.7)                                                        | 0                                           |
|   | W127          | 11                   | 7 (63.6)                                                        | 0                                           |
|   | W128          | 11                   | 9 (81.8)                                                        | 0                                           |
|   | W129‡         | 11                   | 6 (54.5)                                                        | -                                           |

\*Confirmed by PCR to contain *Pdx1-Hes1* transgene sequences.

†Confirmed by PCR.

‡Chimeric boar derived from a *Pdx1-Hes1* clone embryo and a colored-coat hybrid embryo.

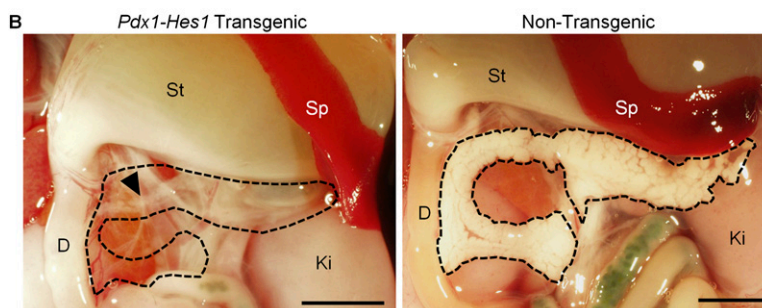

**Fig. S3.** Production details of chimeric pigs by blastocyst complementation and reproductive performance of the chimeric boars. (A) Transmission of the pancreatogenesis-disabled phenotype from chimeric boars to offspring. Each chimeric boar was mated with a WT sow, and fetuses between days 69 and 109 of gestation were examined. (B) Pancreatogenesis-disabled phenotype in offspring of a chimeric boar. Transgenic fetus (Left) and nontransgenic fetus (Right) littermates sired by a chimeric boar (W129) are shown at day 69 of gestation. The arrowhead (Left) and dotted area (Right) indicate a vestigial pancreas and a normally formed pancreas, respectively. D, duodenum; Ki, kidney; Sp, spleen; St, stomach. (Scale bars: B, 5 mm.)

**Table S1. Production efficiency of pancreatogenesis-disabled pig fetuses by introduction of the *Pdx1-Hes1* transgene using intracytoplasmic sperm injection-mediated gene transfer**

| Recipient | No. of embryos transferred | Pregnancy | No. of fetuses, embryonic days | No. of transgenic fetuses | Pancreatogenesis-disabled phenotype |
|-----------|----------------------------|-----------|--------------------------------|---------------------------|-------------------------------------|
| P9        | 106                        | —         | —                              | —                         | —                                   |
| P10       | 127                        | +         | 2 (day 74)                     | 1                         | 1*                                  |
| P11       | 132                        | —         | —                              | —                         | —                                   |
| P12       | 95                         | +         | Aborted                        | —                         | —                                   |
| P20       | 136                        | —         | —                              | —                         | —                                   |
| P21       | 79                         | +         | Aborted                        | —                         | —                                   |
| P30       | 130                        | +         | Aborted                        | —                         | —                                   |
| P31       | 75                         | +         | Aborted                        | —                         | —                                   |
| Y16       | 62                         | +         | 1 (day 55)                     | 1                         | 0                                   |
| Y17       | 124                        | —         | —                              | —                         | —                                   |
| Y23       | 70                         | +         | 3 (day 80)                     | 2                         | 1*                                  |
| M11       | 53                         | +         | Aborted                        | —                         | —                                   |
| M12       | 93                         | +         | 5 (day 86)                     | 1                         | 0                                   |
| Total     | 1,282                      | 9         | 11 [0.9%, 11/1,282]            | 5 [0.4%, 5/1,282]         | 2 [0.2%, 2/1,282]                   |

\*A male fetus (P10-2) of recipient P10 and a female fetus (Y23-2) of recipient Y23 displayed the pancreatogenesis-disabled phenotype, whereas other fetuses had apparently normal pancreata.

**Table S2. Reproduction efficiency of pancreatogenesis-disabled *Pdx1-Hes1* transgenic fetuses by somatic cell cloning**

| Recipient | No. of cloned embryos transferred | Pregnancy | No. of cloned fetuses obtained (%) | Age of the fetuses at laparotomy, d |
|-----------|-----------------------------------|-----------|------------------------------------|-------------------------------------|
| P40       | 115                               | +         | 5 (4.3)                            | 59                                  |
| P41       | 114                               | +         | 4 (3.5)                            | 110                                 |
| Total     | 229                               | 2         | 9 (3.9)                            |                                     |

**Table S3. Production details of chimeric pig fetuses by complementation of *Pdx1-Hes1* clone embryos with *huKO* clone embryos**

| Type of SCNT embryos                                             | <i>Pdx1-Hes1</i> transgenic [host embryos]* (%) | <i>huKO</i> transgenic [donor embryos]* (%) |
|------------------------------------------------------------------|-------------------------------------------------|---------------------------------------------|
| In vitro production of chimeric blastocysts using cloned embryos |                                                 |                                             |
| SCNT embryos cultured                                            | 201                                             | 142                                         |
| Normally cleaved embryos on day 2                                | 154 (76.6%)                                     | 114 (80.3%)                                 |
| Morula-stage embryos on day 4                                    | 146 (72.6%) <sup>†</sup>                        | 110 (77.5%) <sup>†</sup>                    |
| Morulae used to produce chimeric embryos                         | 97 (48.3%)                                      | 64 (45.1%)                                  |
| Chimeric embryos produced                                        | 97 <sup>‡</sup>                                 |                                             |
| Chimeric blastocysts developed                                   | 96 (99.0%) <sup>§</sup>                         |                                             |
| Production efficiency of chimeric fetuses after embryo transfer  |                                                 |                                             |
| Recipient                                                        | B53 <sup>¶</sup>                                | B54 <sup>¶</sup>                            |
| Blastocysts transferred                                          | 45                                              | 51                                          |
| Fetuses obtained                                                 | 5 (11.1%) <sup>  </sup>                         | 9 (17.6%) <sup>  </sup>                     |
| Chimeric fetuses                                                 | 1 (20.0%) <sup>**</sup>                         | 4 (44.4%) <sup>**</sup>                     |
| Nonchimeric fetuses derived from <i>Pdx1-Hes1</i> host embryo    | 3 (60.0%) <sup>††</sup>                         | 2 (22.2%) <sup>††</sup>                     |
| Nonchimeric fetuses derived from <i>huKO</i> donor embryo        | 1 (20.0%) <sup>**</sup>                         | 3 (33.3%) <sup>**</sup>                     |

*huKO*, the gene encoding orange fluorescent protein humanized Kusabira-Orange; SCNT, somatic cell nuclear transfer.

\**Pdx1-Hes1* ⇔ *huKO* chimera.

<sup>†</sup>More than 70% of the cloned embryos in both the host and donor embryo groups developed to the morula stage. These morulae, selected for blastomeres of uniform size and shape, were used to produce chimeric embryos.

<sup>‡</sup>Of 97 host embryos injected with ~10 donor blastomeres, 96 (99.0%)<sup>§</sup> developed into blastocysts after culture for 24 h. Transfer of those blastocysts on day 5 or 6 into two estrus-synchronized recipients<sup>¶</sup> gave rise to 14 fetuses,<sup>||</sup> including 5 chimeric fetuses.<sup>\*\*</sup> Nonchimeric fetuses entirely reproducing the characteristics of the host<sup>††</sup> or donor<sup>\*\*</sup> embryos were obtained in each litter.

**Table S4. Comparison of features of chimeric and nonchimeric cloned fetuses (days 110 and 111)**

| Type of fetuses                     | Fetus | Body length, cm | Body weight, g | Sex | Weight of pancreas or vestigial pancreas, g | Pancreas weight per body weight, % |
|-------------------------------------|-------|-----------------|----------------|-----|---------------------------------------------|------------------------------------|
| Chimera                             | B53-1 | 30              | 1,392          | ♂   | 1.416                                       | 0.102                              |
|                                     | B54-1 | 25              | 802            | ♂   | 0.448                                       | 0.056                              |
|                                     | B54-5 | 22.5            | 452            | ♂   | 0.344                                       | 0.076                              |
|                                     | B54-8 | 19              | 288            | ♂   | 0.262                                       | 0.091                              |
|                                     | B54-9 | 18              | 216            | ♂   | 0.183                                       | 0.085                              |
| Average                             |       | 22.9 ± 2.2      | 630 ± 215.7    |     | 0.531 ± 0.4513                              | 0.082 ± 0.016                      |
| <i>huKO</i> clone*                  | B53-2 | 27              | 842            | ♀   | 0.678                                       | 0.081                              |
|                                     | B54-3 | 23              | 702            | ♀   | 0.521                                       | 0.074                              |
|                                     | B54-4 | 24.5            | 688            | ♀   | 0.588                                       | 0.085                              |
|                                     | B54-7 | 20              | 378            | ♀   | 0.383                                       | 0.101                              |
| Average                             |       | 23.6 ± 1.5      | 652.5 ± 97.9   |     | 0.543 ± 0.1076                              | 0.085 ± 0.010                      |
| <i>Pdx1-Hes1</i> clone <sup>†</sup> | B53-3 | 23.5            | 680            | ♂   | 0.008                                       | 0.001                              |
|                                     | B53-4 | 23              | 650            | ♂   | 0.041                                       | 0.006                              |
|                                     | B53-5 | 21              | 458            | ♂   | 0 <sup>‡</sup>                              | 0                                  |
|                                     | B54-2 | 23              | 596            | ♂   | 0 <sup>‡</sup>                              | 0                                  |
|                                     | B54-6 | 22.5            | 490            | ♂   | 0.014                                       | 0.003                              |
| Average                             |       | 22.6 ± 0.4      | 574.8 ± 43.6   |     | 0.013 ± 0.0076                              | 0.002 ± 0.002                      |

*huKO*, the gene encoding orange fluorescent protein humanized Kusabira-Orange.

\*Nonchimeric cloned fetuses derived from donor embryos.

<sup>†</sup>Nonchimeric cloned fetuses derived from host embryos.

<sup>‡</sup>No vestigial pancreatic tissue was collectable.

**Table S5. Production efficiency of chimeric embryos and offspring using somatic cell nuclear transfer embryos: *Pdx1-Hes1* ⇌ *huKO* chimera**

| Type of SCNT embryos                                           | <i>Pdx1-Hes1</i> (host embryos) | <i>huKO</i> (donor embryos) |
|----------------------------------------------------------------|---------------------------------|-----------------------------|
| In vitro production of chimeric blastocysts using SCNT embryos |                                 |                             |
| SCNT embryos cultured                                          | 199                             | 148                         |
| Normally cleaved embryos on day 2                              | 174 (87.4%)                     | 106 (71.6%)                 |
| Morula-stage embryos on day 4                                  | 145 (72.9%)                     | 92 (62.2%)                  |
| Morulae used to produce chimeric embryos                       | 113 (56.8%)                     | 76 (71.6%)                  |
| Chimeric embryos produced                                      |                                 | 113                         |
| Chimeric blastocysts developed                                 |                                 | 109 (96.5%)                 |
| Production efficiency of chimeric pigs after embryo transfer   |                                 |                             |
| Recipient                                                      | B77                             | B78                         |
| Blastocysts transferred                                        | 58 (day 6)                      | 51 (day 5)                  |
| Piglets obtained                                               | 6 (10.3%)                       | 7 (13.7%)                   |
| Chimeric piglets                                               | 3 (50.0%)                       | 1 (14.3%)                   |
| Nonchimeric piglets derived from <i>Pdx1-Hes1</i> host embryo  | 3 (50.0%)                       | 5 (71.4%)                   |
| Nonchimeric piglets derived from <i>huKO</i> donor embryo      | 0 (0%)                          | 1 (14.3%)                   |

*huKO*, the gene encoding orange fluorescent protein humanized Kusabira-Orange; SCNT, somatic cell nuclear transfer.

**Table S6. Production efficiency of chimeric embryos and offspring using somatic cell nuclear transfer embryos: *Pdx1-Hes1* ⇌ WT chimera**

| Type of SCNT embryos                                           | <i>Pdx1-Hes1</i> (host embryos) | WT* (donor embryos) |
|----------------------------------------------------------------|---------------------------------|---------------------|
| In vitro production of chimeric blastocysts using SCNT embryos |                                 |                     |
| SCNT embryos cultured                                          | 103                             | 74                  |
| Normally cleaved embryos on day 2                              | 81 (78.6%)                      | 56 (75.6%)          |
| Morula-stage embryos on day 4                                  | 66 (64.1%)                      | 56 (75.6%)          |
| Morulae used to produce chimeric embryos                       | 92 (96.1%)                      | 70 (94.6%)          |
| Chimeric embryos produced                                      |                                 | 92                  |
| Chimeric blastocysts developed                                 |                                 | 80 (87.0%)          |
| Production efficiency of chimeric pigs after embryo transfer   |                                 |                     |
| Recipient                                                      |                                 | B83                 |
| Blastocysts transferred                                        |                                 | 80 (day 6)          |
| Piglets obtained                                               |                                 | 6 (7.5%)            |
| Chimeric piglets                                               |                                 | 1 (16.7%)           |
| Nonchimeric piglets derived from <i>Pdx1-Hes1</i> host embryo  |                                 | 2 (33.3%)           |
| Nonchimeric piglets derived from WT donor embryo               |                                 | 3 (50.0%)           |

SCNT, somatic cell nuclear transfer.

\*Cloned embryos derived from a colored-coat WT sow (Duroc × Berkshire hybrid) were used as donor embryos.

**Table S7. Serum biochemical profile in *Pdx1-Hes1* cloned piglets**

| Parameters     | <i>Pdx1-Hes1</i> cloned offspring |                   | Control <sup>†</sup> (n = 5) |
|----------------|-----------------------------------|-------------------|------------------------------|
|                | No. 1                             | No. 2             |                              |
|                | 3-d-old                           | 4-d-old           | 4- to 5-d-old*               |
| TP, g/dL       | 6.7                               | 5.4               | 5.0 ± 0.39                   |
| BUN, mg/dL     | 130.6                             | 47.9              | 9.16 ± 2.76                  |
| CRE, mg/dL     | 1.8                               | 0.9               | 0.36 ± 0.05                  |
| Na, mEq/L      | 157                               | 130               | 136.4 ± 1.50                 |
| K, mEq/L       | 7.8                               | 4.8               | 4.62 ± 0.65                  |
| Cl, mEq/L      | 121                               | 97                | 94.8 ± 2.86                  |
| Ca, mg/dL      | 6.82                              | 6.22              | 6.04 ± 0.43                  |
| IP, mg/dL      | >4.84 <sup>‡</sup>                | 4.38              | 2.57 ± 0.79                  |
| AST, U/L       | 220                               | 27                | 78.6 ± 61.93                 |
| ALT, U/L       | 95                                | 108               | 44.2 ± 17.46                 |
| TCHO, mg/dL    | 143                               | 121               | 139.2 ± 66.17                |
| TG, mg/dL      | 109                               | 33                | 106.6 ± 17.23                |
| GLU, mg/dL     | >600 <sup>‡</sup>                 | >600 <sup>‡</sup> | 140.6 ± 36.64                |
| Insulin, ng/mL | ND                                | ND                | 2.003 ± 0.99                 |

ALT, alanine aminotransaminase; AST, aspartate aminotransferase; BUN, blood urea nitrogen; Ca, calcium; Cl, chloride; CRE, creatinine; GLU, glucose; IP, inorganic phosphate; K, potassium; Na, sodium; ND, nondetectable; TCHO, total cholesterol; TG, triglyceride; TP, total protein.

\*Mean ± SD values are provided.

<sup>†</sup>WT piglets of the same strain and age were used as controls.

<sup>‡</sup>Above the highest detectable level.

**Table S8. Serum biochemical profile in chimeric pigs**

| Parameters     | Chimera          |                   | Control          |                   |
|----------------|------------------|-------------------|------------------|-------------------|
|                | 6-mo-old (n = 3) | 12-mo-old (n = 4) | 6-mo-old (n = 5) | 12-mo-old (n = 4) |
| TP, g/dL       | 7.6 ± 0.33       | 8.1 ± 0.19        | 7.58 ± 0.40      | 7.0 ± 0.72        |
| ALB, g/dL      | 3.6 ± 0.26       | 3.8 ± 0.54        | 3.28 ± 0.35      | 3.7 ± 0.26        |
| A/G            | 0.9 ± 0.26       | 1.0 ± 0.26        | 0.8 ± 0.20       | 1.2 ± 0.08        |
| BUN, mg/dL     | 9.9 ± 0.96       | 11.7 ± 2.32       | 13.22 ± 2.80     | 10.4 ± 2.14       |
| CRE, mg/dL     | 1.02 ± 0.08      | 1.63 ± 0.15       | 1.294 ± 0.13     | 1.74 ± 0.19       |
| Na, mEq/L      | 144 ± 2.05       | 141 ± 2.28        | 141.8 ± 1.47     | 140.5 ± 1.50      |
| K, mEq/L       | 4.4 ± 0.12       | 4.8 ± 0.11        | 5.22 ± 0.65      | 4.5 ± 0.33        |
| Cl, mEq/L      | 98 ± 4.78        | 99 ± 2.86         | 99.2 ± 3.19      | 101.0 ± 3.74      |
| Ca, mg/dL      | 10.0 ± 0.08      | 9.8 ± 0.19        | 10.2 ± 0.36      | 9.4 ± 0.55        |
| IP, mg/dL      | 7.2 ± 0.17       | 7.0 ± 0.58        | 7.7 ± 1.03       | 5.5 ± 0.53        |
| AST, IU/L      | 59 ± 32.22       | 35 ± 3.90         | 32.6 ± 7.42      | 27 ± 5.24         |
| ALT, IU/L      | 44 ± 7.41        | 39 ± 15.35        | 29.4 ± 3.26      | 38 ± 4.50         |
| ALP, IU/L      | 335 ± 24.57      | 206 ± 61.64       | 504 ± 210.34     | 256 ± 75.72       |
| γ-GT, IU/L     | 34 ± 16.58       | 53 ± 30.41        | 24.8 ± 11.05     | 48 ± 9.41         |
| LIP, IU/L      | 10 ± 1.25        | 6.5 ± 1.50        | 10.6 ± 1.74      | 6.8 ± 1.30        |
| TCHO, mg/dL    | 68 ± 7.12        | 60 ± 9.01         | 85.4 ± 8.28      | 58 ± 10.62        |
| TG, mg/dL      | 30 ± 5.66        | 39 ± 10.71        | 44 ± 13.84       | 29 ± 16.32        |
| HDL-C, mg/dL   | 28 ± 0.47        | 25 ± 5.36         | 39.6 ± 5.61      | 25 ± 2.92         |
| TBIL, mg/dL    | 0.07 ± 0.03      | 0.06 ± 0.04       | 0.04 ± 0.01      | 0.07 ± 0.03       |
| GLU, mg/dL     | 105 ± 14.73      | 88 ± 25.16        | 110 ± 37.22      | 86 ± 9.94         |
| GA, %          | 4.5 ± 1.14       | 5.2 ± 1.12        | 3.96 ± 0.84      | 6.0 ± 0.31        |
| Insulin, ng/mL | 1.851 ± 0.88     | 1.360 ± 0.803     | 3.220 ± 0.85     | 1.907 ± 2.44      |

Mean ± SD values are provided. A/G, albumin-globulin ratio; ALB, albumin; ALP, alkaline phosphatase; ALT, alanine aminotransaminase; AST, aspartate aminotransferase; BUN, blood urea nitrogen; Ca, calcium; Cl, chloride; CRE, creatinine; GA, glycoalbumin; GLU, glucose; γ-GT, γ-glutamyl transpeptidase; HDL-C, high-density lipoprotein cholesterol; IP, inorganic phosphate; K, potassium; LIP, lipase; Na, sodium; TBIL, total bilirubin; TCHO, total cholesterol; TG, triglyceride; TP, total protein.
